# Supplementary material for: Predicting neurological Adverse Drug Reactions based on biological, chemical and phenotypic properties of drugs using machine learning models
Source: PubMed Central journal article supplement (PMC5429831; doi:10.1038/s41598-017-00908-z), 2017-04-13
Supplement: 41598_2017_908_MOESM1_ESM.pdf [file 41598_2017_908_MOESM1_ESM.pdf]

# **Predicting neurological Adverse Drug Reactions based on biological, chemical and phenotypic properties of drugs using machine learning models**

**Salma Jamal<sup>a</sup>, Sukriti Goyal<sup>a</sup>, Asheesh Shanker<sup>a, b</sup>, Abhinav Grover<sup>c\*</sup>**

<sup>a</sup> Department of Bioscience and Biotechnology, Banasthali University, Tonk, Rajasthan, India

<sup>b</sup> Bioinformatics Programme, Centre for Biological Sciences, Central University of South Bihar, BIT Campus, Patna, Bihar, India

<sup>c</sup> School of Biotechnology, Jawaharlal Nehru University, New Delhi, India

\*Corresponding author: abhinavgr@gmail.com, agrover@jnu.ac.in

**Supplementary table 1** lists the features obtained after application of relief-based feature selection.

| <b>Biological</b> |          | <b>Phenotypic</b> | <b>Chemical</b> |
|-------------------|----------|-------------------|-----------------|
| P24462            | enzymes  | C0919572          | PubchemFP518    |
| P20815            |          | C1319200          | PubchemFP148    |
| P08684            |          | C0281803          | PubchemFP149    |
| P10635            |          | C0524662          | PubchemFP336    |
| P11712            |          | C0919569          | PubchemFP517    |
| P05177            |          | C0235524          | PubchemFP422    |
| P33261            |          | C0857494          | PubchemFP515    |
| P10632            |          | C0858765          | PubchemFP300    |
| P20813            |          | C0860713          | PubchemFP615    |
| P05181            |          | C0020440          | PubchemFP3      |
| P04798            |          | C0231837          | PubchemFP636    |
| P11509            |          | C1141861          | PubchemFP682    |
| P06276            |          | C1619712          | PubchemFP709    |
| P23219            |          | targets           | C1510472        |
| P35354            | C0026650 |                   | PubchemFP688    |
| P35348            | C0036973 |                   | PubchemFP560    |
| P08913            | C0162297 |                   | PubchemFP430    |
| P11229            | C0026837 |                   | PubchemFP16     |
| P04150            | C0027066 |                   | PubchemFP593    |
| P14416            | C0206277 |                   | PubchemFP375    |
| P14867            | C0235063 |                   | PubchemFP657    |
| P34903            | C0855775 |                   | PubchemFP585    |
| P47869            | C0023066 |                   | PubchemFP646    |
| P35367            | C0011615 |                   | PubchemFP377    |
| P31644            | C0151828 |                   | PubchemFP600    |
| Q16445            | C0003578 |                   | PubchemFP356    |
| P48169            | C0013384 |                   | PubchemFP665    |
| Q8N1C3            | C0019521 |                   | PubchemFP495    |
| P47870            | C0497247 |                   | PubchemFP546    |
| Q99928            | C0235146 |                   | PubchemFP611    |
| Q9UN88            | C0233407 |                   | PubchemFP502    |
| O14764            | C0547030 |                   | PubchemFP569    |
| P18507            | C0340865 |                   | PubchemFP545    |
| P78334            | C0018790 |                   | PubchemFP439    |
| P28472            | C0006266 |                   | PubchemFP376    |
| O00591            | C0014591 |                   | PubchemFP645    |
| P18505            | C0013144 |                   | PubchemFP659    |
| P28223            | C0009782 |                   | PubchemFP437    |
| P35368            | C3665347 |                   | PubchemFP180    |
| P07550            | C0428977 |                   | PubchemFP628    |

|        |              |          |              |
|--------|--------------|----------|--------------|
| P20309 |              | C0015397 | PubchemFP680 |
| P08172 |              | C0025061 | PubchemFP633 |
| P28335 |              | C0018799 | PubchemFP566 |
| P08908 |              | C0042373 | PubchemFP449 |
| P18089 |              | C0004936 | PubchemFP451 |
| P08588 |              | C0021053 | PubchemFP689 |
| P35372 |              | C0085593 | PubchemFP696 |
| P18825 |              | C0011991 | PubchemFP549 |
| P23975 |              | C0003811 | PubchemFP181 |
| P21728 |              | C0041657 | PubchemFP341 |
| P31645 |              | C0041834 | PubchemFP405 |
| P41143 |              | C0085631 | PubchemFP299 |
| P28221 |              | C0010200 | PubchemFP607 |
| P28222 |              | C0178298 | PubchemFP393 |
| P11388 |              | C0344232 | PubchemFP464 |
| P08173 |              | C0000737 | PubchemFP579 |
| P25100 |              | C0687713 | PubchemFP573 |
| P03372 |              | C0027765 | PubchemFP143 |
| P08912 |              | C0020538 | PubchemFP698 |
| P41145 |              | C0009676 | PubchemFP619 |
| P35462 |              | C0037274 | PubchemFP684 |
| Q72547 |              | C0036572 | PubchemFP346 |
| P10275 |              | C0232462 | PubchemFP578 |
| Q14524 |              | C0013395 | PubchemFP603 |
| Q01959 |              | C0020458 | PubchemFP618 |
| P08183 | transporters | C0009806 | PubchemFP641 |
| Q4U2R8 |              | C0039231 | PubchemFP552 |
| Q9UNQ0 |              | C0948594 | PubchemFP668 |
| P46059 |              | C0917801 | PubchemFP634 |
| Q16348 |              | C0002792 | PubchemFP584 |
| O15245 |              | C0013404 | PubchemFP677 |
| P46721 |              | C2830004 | PubchemFP608 |
| O15244 |              | C0003123 | PubchemFP595 |
| Q92887 |              | C0040034 | PubchemFP520 |
| Q9Y6L6 |              | C0030554 | PubchemFP470 |
| Q8TCC7 |              | C0231528 | PubchemFP371 |
| P33527 |              | C0043352 | PubchemFP391 |
| O76082 |              | C0020649 | PubchemFP308 |
|        |              | C0017178 | PubchemFP655 |
|        |              | C0036974 | PubchemFP406 |
|        |              | C0231218 | PubchemFP535 |
|        |              | C0003862 | PubchemFP570 |
|        |              | C0015672 | PubchemFP548 |
|        |              | C2047937 | PubchemFP574 |

|  |  |          |              |
|--|--|----------|--------------|
|  |  | C0003467 | PubchemFP637 |
|  |  | C0030252 | PubchemFP384 |
|  |  | C0009450 | PubchemFP418 |
|  |  | C0039070 | PubchemFP366 |
|  |  | C0008031 | PubchemFP370 |
|  |  | C0234215 | PubchemFP692 |
|  |  | C1443060 | PubchemFP257 |
|  |  | C0233494 | PubchemFP664 |
|  |  | C0023530 | PubchemFP442 |
|  |  | C0027769 | PubchemFP564 |
|  |  | C0004604 | PubchemFP453 |
|  |  | C0013604 | PubchemFP256 |
|  |  | C0040822 | PubchemFP355 |
|  |  | C0002871 | PubchemFP697 |
|  |  | C0042571 | PubchemFP358 |
|  |  | C0016204 | PubchemFP387 |
|  |  | C0037763 | PubchemFP704 |
|  |  | C0030193 | PubchemFP255 |
|  |  | C0040264 | PubchemFP15  |
|  |  | C0002170 | PubchemFP396 |
|  |  | C0002994 | PubchemFP538 |
|  |  | C0035455 | PubchemFP541 |
|  |  | C0162429 | PubchemFP381 |
|  |  | C0031350 | PubchemFP606 |
|  |  | C0015967 | PubchemFP498 |
|  |  | C0041969 | PubchemFP651 |
|  |  | C0042075 | PubchemFP403 |
|  |  | C0085649 | PubchemFP506 |
|  |  | C0014742 | PubchemFP472 |
|  |  | C0042109 | PubchemFP482 |
|  |  | C0037199 | PubchemFP656 |
|  |  | C0013378 | PubchemFP617 |
|  |  | C0242350 | PubchemFP643 |
|  |  | C0042023 | PubchemFP443 |
|  |  | C0162830 | PubchemFP340 |
|  |  | C0018524 | PubchemFP683 |
|  |  | C0038362 | PubchemFP523 |
|  |  | C0001824 | PubchemFP382 |
|  |  | C0851353 | PubchemFP186 |
|  |  | C0009763 | PubchemFP678 |
|  |  | C0019158 | PubchemFP660 |
|  |  | C0267792 | PubchemFP640 |
|  |  | C0032285 | PubchemFP555 |
|  |  | C0038325 | PubchemFP613 |

|  |  |          |              |
|--|--|----------|--------------|
|  |  | C0019080 | PubchemFP380 |
|  |  | C0043094 | PubchemFP666 |
|  |  | C0042029 | PubchemFP594 |
|  |  | C0518015 | PubchemFP179 |
|  |  | C1384353 | PubchemFP12  |
|  |  | C0851341 | PubchemFP592 |
|  |  | C0004093 | PubchemFP542 |
|  |  | C0020580 | PubchemFP553 |
|  |  | C0018965 | PubchemFP710 |
|  |  | C0020456 | PubchemFP524 |
|  |  | C0027947 | PubchemFP712 |
|  |  | C0043096 | PubchemFP392 |
|  |  | C0006277 | PubchemFP604 |
|  |  | C0013428 | PubchemFP599 |
|  |  | C0948089 | PubchemFP185 |
|  |  | C0027051 | PubchemFP540 |
|  |  | C0855242 | PubchemFP556 |
|  |  | C0017152 | PubchemFP490 |
|  |  | C0038990 | PubchemFP530 |
|  |  | C0011124 | PubchemFP516 |
|  |  | C0011168 | PubchemFP539 |
|  |  | C0085633 | PubchemFP434 |
|  |  | C0022346 | PubchemFP20  |
|  |  | C0233472 | PubchemFP614 |
|  |  | C0149931 | PubchemFP146 |
|  |  | C0035078 | PubchemFP420 |
|  |  | C0003864 | PubchemFP431 |
|  |  | C0004134 | PubchemFP671 |
|  |  | C0030305 | PubchemFP708 |
|  |  | C0016382 | PubchemFP390 |
|  |  | C0002962 | PubchemFP452 |
|  |  | C0151786 | PubchemFP626 |
|  |  | C0021400 | PubchemFP589 |
|  |  | C0011175 | PubchemFP565 |
|  |  | C0030312 | PubchemFP345 |
|  |  | C0029408 | PubchemFP476 |
|  |  | C0004096 | PubchemFP357 |
|  |  | C0031117 | PubchemFP365 |
|  |  | C0080274 | PubchemFP440 |
|  |  | C0020651 | PubchemFP576 |
|  |  | C0039971 | PubchemFP351 |
|  |  | C0232461 | PubchemFP450 |
|  |  | C0002622 | PubchemFP521 |
|  |  | C0497156 | PubchemFP597 |

|  |  |          |              |
|--|--|----------|--------------|
|  |  | C0151905 | PubchemFP446 |
|  |  | C0034150 | PubchemFP285 |
|  |  | C0151827 | PubchemFP679 |
|  |  | C0014518 | PubchemFP192 |
|  |  | C0011570 | PubchemFP487 |
|  |  | C0013456 | PubchemFP339 |
|  |  | C0542571 | PubchemFP379 |
|  |  | C0014457 | PubchemFP145 |
|  |  | C0404521 | PubchemFP699 |
|  |  | C0006145 | PubchemFP373 |
|  |  | C1306341 | PubchemFP441 |
|  |  | C0041912 | PubchemFP491 |
|  |  | C0026826 | PubchemFP333 |
|  |  | C0017160 | PubchemFP14  |
|  |  | C1368065 | PubchemFP484 |
|  |  | C0013491 | PubchemFP674 |
|  |  | C3665386 | PubchemFP447 |
|  |  | C0012569 | PubchemFP416 |
|  |  | C0011053 | PubchemFP493 |
|  |  | C0033975 | PubchemFP519 |
|  |  | C0042267 | PubchemFP596 |
|  |  | C0232849 | PubchemFP528 |
|  |  | C0013595 | PubchemFP571 |
|  |  | C0014724 | PubchemFP2   |
|  |  | C0032617 | PubchemFP818 |
|  |  | C0151908 | PubchemFP567 |
|  |  | C0149745 | PubchemFP335 |
|  |  | C0151904 | PubchemFP389 |
|  |  | C0022408 | PubchemFP623 |
|  |  | C0010692 | PubchemFP577 |
|  |  | C0020625 | PubchemFP798 |
|  |  | C0042024 | PubchemFP504 |
|  |  | C0403632 | PubchemFP572 |
|  |  | C0349506 | PubchemFP797 |
|  |  | C0233632 | PubchemFP445 |
|  |  | C0000731 | PubchemFP777 |
|  |  | C0424295 | PubchemFP582 |
|  |  | C0014868 | PubchemFP662 |
|  |  | C0243026 | PubchemFP338 |
|  |  | C0520966 | PubchemFP352 |
|  |  | C0235431 | PubchemFP776 |
|  |  | C0017181 | PubchemFP667 |
|  |  | C1167965 | PubchemFP293 |
|  |  | C0025222 | PubchemFP353 |

|  |  |          |              |
|--|--|----------|--------------|
|  |  | C3263723 | PubchemFP620 |
|  |  | C0851354 | PubchemFP632 |
|  |  | C0007859 | PubchemFP33  |
|  |  | C0234458 | PubchemFP372 |
|  |  | C0700590 | PubchemFP672 |
|  |  | C0575081 | PubchemFP691 |
|  |  | C0015371 | PubchemFP435 |
|  |  | C0027441 | PubchemFP178 |
|  |  | C0009319 | PubchemFP819 |
|  |  | C0011253 | PubchemFP711 |
|  |  | C0023218 | PubchemFP638 |
|  |  | C0231530 | PubchemFP334 |
|  |  | C0018099 | PubchemFP386 |
|  |  | C0233471 | PubchemFP860 |
|  |  | C0026821 | PubchemFP821 |
|  |  | C1565489 | PubchemFP438 |
|  |  | C0020615 | PubchemFP499 |
|  |  | C0085632 | PubchemFP690 |
|  |  | C0024902 | PubchemFP547 |
|  |  | C0011849 | PubchemFP432 |
|  |  | C0006840 | PubchemFP485 |
|  |  | C0151766 | PubchemFP286 |
|  |  | C0020443 | PubchemFP580 |
|  |  | C0038454 | PubchemFP144 |
|  |  | C0002878 | PubchemFP19  |
|  |  | C0018418 | PubchemFP758 |
|  |  | C0152459 | PubchemFP536 |
|  |  | C0002453 | PubchemFP735 |
|  |  | C0852911 | PubchemFP501 |
|  |  | C0020621 | PubchemFP362 |
|  |  | C1257843 | PubchemFP550 |
|  |  | C0746883 | PubchemFP702 |
|  |  | C0338831 | PubchemFP598 |
|  |  | C0028084 | PubchemFP639 |
|  |  | C0162835 | PubchemFP591 |
|  |  | C0235660 | PubchemFP378 |
|  |  | C0151514 | PubchemFP503 |
|  |  | C0011551 | PubchemFP342 |
|  |  | C0392156 | PubchemFP507 |
|  |  | C0027651 | PubchemFP383 |
|  |  | C0234133 | PubchemFP663 |
|  |  | C0030196 | PubchemFP586 |
|  |  | C0018801 | PubchemFP531 |
|  |  | C0023067 | PubchemFP412 |

|  |  |          |              |
|--|--|----------|--------------|
|  |  | C0017601 | PubchemFP714 |
|  |  | C0017979 | PubchemFP294 |
|  |  | C0267596 | PubchemFP681 |
|  |  | C0549249 | PubchemFP37  |
|  |  | C0086439 | PubchemFP839 |
|  |  | C0423791 | PubchemFP602 |
|  |  | C0085932 | PubchemFP658 |
|  |  | C0002874 | PubchemFP840 |
|  |  | C0263449 | PubchemFP701 |
|  |  | C0026961 | PubchemFP861 |
|  |  | C2225524 | PubchemFP693 |
|  |  | C0020039 | PubchemFP673 |
|  |  |          | PubchemFP182 |
|  |  |          | PubchemFP703 |
|  |  |          | PubchemFP11  |
|  |  |          | PubchemFP385 |
|  |  |          | PubchemFP532 |
|  |  |          | PubchemFP259 |
|  |  |          | PubchemFP705 |
|  |  |          | PubchemFP624 |
|  |  |          | PubchemFP581 |
|  |  |          | PubchemFP642 |
|  |  |          | PubchemFP184 |
|  |  |          | PubchemFP590 |
|  |  |          | PubchemFP183 |
|  |  |          | PubchemFP700 |
|  |  |          | PubchemFP489 |
|  |  |          | PubchemFP500 |
|  |  |          | PubchemFP756 |
|  |  |          | PubchemFP601 |
|  |  |          | PubchemFP397 |
|  |  |          | PubchemFP349 |
|  |  |          | PubchemFP824 |
|  |  |          | PubchemFP755 |
|  |  |          | PubchemFP661 |
|  |  |          | PubchemFP563 |
|  |  |          | PubchemFP131 |
|  |  |          | PubchemFP621 |
|  |  |          | PubchemFP337 |
|  |  |          | PubchemFP652 |
|  |  |          | PubchemFP480 |
|  |  |          | PubchemFP533 |
|  |  |          | PubchemFP368 |
|  |  |          | PubchemFP132 |



|  |  |  |              |
|--|--|--|--------------|
|  |  |  | PubchemFP18  |
|  |  |  | PubchemFP761 |
|  |  |  | PubchemFP544 |
|  |  |  | PubchemFP610 |
|  |  |  | PubchemFP462 |
|  |  |  | PubchemFP537 |
|  |  |  | PubchemFP465 |
|  |  |  | PubchemFP779 |
|  |  |  | PubchemFP258 |
|  |  |  | PubchemFP630 |
|  |  |  | PubchemFP129 |
|  |  |  | PubchemFP473 |
|  |  |  | PubchemFP475 |
|  |  |  | PubchemFP21  |
|  |  |  | PubchemFP483 |

**Supplementary table 2** mentions the different percentages at which the under-sampled class was over-sampled using SMOTE method.

| <b>Neurological ADR</b>                       | <b>SMOTE % (final %age used is in bold)</b> |             |     |     |            |            |
|-----------------------------------------------|---------------------------------------------|-------------|-----|-----|------------|------------|
| Arteritic anterior ischaemic optic neuropathy | 100                                         | 150         | 200 | 250 | <b>300</b> |            |
| Autonomic neuropathy                          | 50                                          | 100         | 150 | 200 | 250        | <b>300</b> |
| Neuromuscular block prolonged                 | 50                                          | 100         | 150 | 200 | 250        | <b>290</b> |
| Neuralgia                                     | <b>1000</b>                                 |             |     |     |            |            |
| Neuritis                                      | <b>1000</b>                                 |             |     |     |            |            |
| Neuropathy                                    | <b>500</b>                                  |             |     |     |            |            |
| Neuromyopathy                                 | 50                                          | 100         | 150 | 200 | 250        | <b>300</b> |
| Neurologic reaction                           | 1000                                        | <b>1100</b> |     |     |            |            |
| Neurosis                                      | <b>2500</b>                                 |             |     |     |            |            |
| Neurotoxicity                                 | <b>2500</b>                                 |             |     |     |            |            |
| Neurological impairment                       | 50                                          | 100         | 150 | 200 | 250        | <b>300</b> |
| Neuroleptic malignant syndrome                | <b>1500</b>                                 |             |     |     |            |            |
| Neuropathy peripheral                         | <b>400</b>                                  |             |     |     |            |            |
| Neuritis retrobulbar                          | <b>300</b>                                  |             |     |     |            |            |
| Neurological symptom                          | <b>4500</b>                                 |             |     |     |            |            |
| Nervous system disorder                       | <b>Balanced</b>                             |             |     |     |            |            |
| Optic neuritis                                | <b>2000</b>                                 |             |     |     |            |            |
| Post herpetic neuralgia                       | 100                                         | 150         | 200 | 250 | <b>300</b> |            |
| Peripheral motor neuropathy                   | <b>6500</b>                                 |             |     |     |            |            |
| Polyneuropathy                                | <b>4000</b>                                 |             |     |     |            |            |
| Peripheral sensory neuropathy                 | <b>3000</b>                                 |             |     |     |            |            |
| Peripheral sensorimotor neuropathy            | 50                                          | 100         | 150 | 200 | 250        | <b>300</b> |

**Supplementary table 3** provides the performances of the models generated using the three levels of features, biological, chemical, and phenotypic and their combination using the imbalanced data as input without applying SMOTE technique.

**Modelling using Biological features**

|                                               | <b>Accuracy (%)</b> | <b>Precision</b> | <b>Recall</b> | <b>F-score</b> | <b>AUC</b> |
|-----------------------------------------------|---------------------|------------------|---------------|----------------|------------|
| Arteritic anterior ischaemic optic neuropathy | 99.45               | 0.99             | 1             | 0.99           | 0.50       |
| Autonomic neuropathy                          | 99.45               | 0.99             | 1             | 0.99           | 0.50       |
| Nervous system disorder                       | 59.5                | 0.60             | 0.86          | 0.70           | 0.55       |
| Neuralgia                                     | 91.25               | 0.91             | 0.99          | 0.95           | 0.49       |
| Neuritis                                      | 93.98               | 0.93             | 1             | 0.96           | 0.6        |
| Neuritis retrobulbar                          | 91.8                | 0.92             | 0.99          | 0.95           | 0.49       |
| Neuroleptic malignant syndrome                | 94.5                | 0.94             | 1             | 0.97           | 0.50       |
| Neurologic reaction                           | 98.9                | 0.98             | 1             | 0.99           | 0.50       |
| Neurological impairment                       | 99.45               | 0.99             | 1             | 0.99           | 0.50       |
| Neurological symptom                          | 97.8                | 0.97             | 1             | 0.98           | 0.50       |
| Neuromuscular block prolonged                 | 99.45               | 0.99             | 1             | 0.99           | 0.50       |
| Neuromyopathy                                 | 99.45               | 0.99             | 1             | 0.99           | 0.50       |
| Neuropathy                                    | 86.88               | 0.86             | 1             | 0.93           | 0.50       |
| Neuropathy peripheral                         | 83.60               | 0.83             | 1             | 0.91           | 0.50       |
| Neurosis                                      | 96.17               | 0.96             | 1             | 0.98           | 0.50       |
| Neurotoxicity                                 | 96.17               | 0.96             | 1             | 0.98           | 0.50       |
| Optic neuritis                                | 95.62               | 0.95             | 1             | 0.97           | 0.50       |
| Peripheral motor neuropathy                   | 98.90               | 0.98             | 1             | 0.99           | 0.50       |
| Peripheral sensorimotor neuropathy            | 99.45               | 0.99             | 1             | 0.99           | 0.50       |
| Peripheral sensory neuropathy                 | 97.26               | 0.97             | 1             | 0.98           | 0.50       |
| Polyneuropathy                                | 97.81               | 0.97             | 1             | 0.98           | 0.50       |
| Post herpetic neuralgia                       | 99.45               | 0.99             | 1             | 0.99           | 0.50       |

## Modelling using Chemical features

|                                               | Accuracy (%) | Precision | Recall | F-score | AUC  |
|-----------------------------------------------|--------------|-----------|--------|---------|------|
| Arteritic anterior ischaemic optic neuropathy | 98.90        | 0.99      | 0.99   | 0.99    | 0.49 |
| Autonomic neuropathy                          | 99.45        | 0.99      | 1      | 0.99    | 0.50 |
| Nervous system disorder                       | 64.48        | 0.67      | 0.73   | 0.70    | 0.63 |
| Neuralgia                                     | 89.61        | 0.92      | 0.97   | 0.94    | 0.51 |
| Neuritis                                      | 90.16        | 0.92      | 0.97   | 0.94    | 0.52 |
| Neuritis retrobulbar                          | 99.45        | 0.99      | 1      | 0.99    | 0.5  |
| Neuroleptic malignant syndrome                | 94.53        | 0.96      | 0.97   | 0.97    | 0.68 |
| Neurologic reaction                           | 98.36        | 0.98      | 0.99   | 0.99    | 0.49 |
| Neurological impairment                       | 98.90        | 0.99      | 0.99   | 0.99    | 0.49 |
| Neurological symptom                          | 96.17        | 0.97      | 0.98   | 0.98    | 0.49 |
| Neuromuscular block prolonged                 | 99.45        | 0.99      | 1      | 0.99    | 0.50 |
| Neuromyopathy                                 | 99.45        | 0.99      | 1      | 0.99    | 0.50 |
| Neuropathy                                    | 78.14        | 0.87      | 0.88   | 0.87    | 0.50 |
| Neuropathy peripheral                         | 75.40        | 0.85      | 0.85   | 0.85    | 0.54 |
| Neurosis                                      | 94.53        | 0.96      | 0.97   | 0.97    | 0.56 |
| Neurotoxicity                                 | 92.89        | 0.97      | 0.95   | 0.96    | 0.62 |
| Optic neuritis                                | 93.44        | 0.96      | 0.97   | 0.96    | 0.54 |
| Peripheral motor neuropathy                   | 98.36        | 0.98      | 0.99   | 0.99    | 0.49 |
| Peripheral sensorimotor neuropathy            | 99.45        | 0.99      | 1      | 0.99    | 0.50 |
| Peripheral sensory neuropathy                 | 96.17        | 0.97      | 0.98   | 0.98    | 0.49 |
| Polyneuropathy                                | 96.17        | 0.97      | 0.98   | 0.98    | 0.49 |
| Post herpetic neuralgia                       | 98.90        | 1         | 0.98   | 0.99    | 0.99 |

## Modelling using Phenotypic features

|                                               | Accuracy (%) | Precision | Recall | F-score | AUC  |
|-----------------------------------------------|--------------|-----------|--------|---------|------|
| Arteritic anterior ischaemic optic neuropathy | 99.45        | 0.99      | 1      | 0.99    | 0.50 |
| Autonomic neuropathy                          | 98.36        | 0.99      | 0.98   | 0.99    | 0.49 |
| Nervous system disorder                       | 87.43        | 0.92      | 0.84   | 0.88    | 0.87 |
| Neuralgia                                     | 88.52        | 0.93      | 0.94   | 0.93    | 0.57 |
| Neuritis                                      | 89.07        | 0.92      | 0.96   | 0.94    | 0.48 |
| Neuritis retrobulbar                          | 99.45        | 0.99      | 1      | 0.99    | 0.50 |
| Neuroleptic malignant syndrome                | 92.89        | 0.94      | 0.97   | 0.96    | 0.53 |
| Neurologic reaction                           | 99.45        | 0.99      | 1      | 0.99    | 0.75 |
| Neurological impairment                       | 99.45        | 0.99      | 1      | 0.99    | 0.50 |
| Neurological symptom                          | 97.81        | 0.97      | 1      | 0.98    | 0.50 |
| Neuromuscular block prolonged                 | 99.45        | 0.99      | 1      | 0.99    | 0.50 |
| Neuromyopathy                                 | 99.45        | 0.99      | 1      | 0.99    | 0.50 |
| Neuropathy                                    | 86.33        | 0.90      | 0.93   | 0.92    | 0.65 |
| Neuropathy peripheral                         | 80.32        | 0.86      | 0.90   | 0.88    | 0.58 |
| Neurosis                                      | 95.0         | 0.97      | 0.97   | 0.97    | 0.63 |
| Neurotoxicity                                 | 94.53        | 0.96      | 0.97   | 0.97    | 0.56 |
| Optic neuritis                                | 94.5         | 0.95      | 0.98   | 0.97    | 0.49 |
| Peripheral motor neuropathy                   | 98.90        | 0.98      | 1      | 0.99    | 0.50 |
| Peripheral sensorimotor neuropathy            | 98.90        | 0.99      | 0.99   | 0.99    | 0.49 |
| Peripheral sensory neuropathy                 | 94.53        | 0.97      | 0.97   | 0.97    | 0.48 |
| Polyneuropathy                                | 96.72        | 0.97      | 0.98   | 0.98    | 0.49 |
| Post herpetic neuralgia                       | 100          | 1         | 1      | 1       | 1    |

## Modelling using Merged features

|                                               | Accuracy (%) | Precision | Recall | F-score | AUC  |
|-----------------------------------------------|--------------|-----------|--------|---------|------|
| Arteritic anterior ischaemic optic neuropathy | 99.45        | 0.99      | 1      | 0.99    | 0.50 |
| Autonomic neuropathy                          | 99.45        | 0.99      | 1      | 0.99    | 0.50 |
| Nervous system disorder                       | 79.78        | 0.83      | 0.80   | 0.82    | 0.79 |
| Neuralgia                                     | 85.79        | 0.93      | 0.90   | 0.92    | 0.61 |
| Neuritis                                      | 90.71        | 0.93      | 0.96   | 0.95    | 0.58 |
| Neuritis retrobulbar                          | 99.45        | 0.99      | 1      | 0.99    | 0.50 |
| Neuroleptic malignant syndrome                | 93.98        | 0.96      | 0.97   | 0.96    | 0.68 |
| Neurologic reaction                           | 99.45        | 0.99      | 1      | 0.99    | 0.75 |
| Neurological impairment                       | 99.45        | 0.99      | 1      | 0.99    | 0.50 |
| Neurological symptom                          | 96.72        | 0.97      | 0.98   | 0.98    | 0.49 |
| Neuromuscular block prolonged                 | 99.45        | 0.99      | 1      | 0.99    | 0.50 |
| Neuromyopathy                                 | 99.45        | 0.99      | 1      | 0.99    | 0.50 |
| Neuropathy                                    | 81.42        | 0.90      | 0.88   | 0.89    | 0.62 |
| Neuropathy peripheral                         | 80.87        | 0.88      | 0.88   | 0.88    | 0.64 |
| Neurosis                                      | 93.98        | 0.97      | 0.96   | 0.96    | 0.69 |
| Neurotoxicity                                 | 93.98        | 0.97      | 0.96   | 0.96    | 0.69 |
| Optic neuritis                                | 93.44        | 0.96      | 0.96   | 0.96    | 0.60 |
| Peripheral motor neuropathy                   | 98.36        | 0.98      | 0.99   | 0.99    | 0.49 |
| Peripheral sensorimotor neuropathy            | 99.45        | 0.99      | 1      | 0.99    | 0.50 |
| Peripheral sensory neuropathy                 | 96.17        | 0.97      | 0.98   | 0.98    | 0.49 |
| Polyneuropathy                                | 97.81        | 0.97      | 1      | 0.98    | 0.50 |
| Post herpetic neuralgia                       | 99.45        | 1         | 0.99   | 0.99    | 0.99 |
